# Supplementary material for: Analytical Validation of a Direct Competitive ELISA for Multiple Mycotoxin Detection in Human Serum
Source: MDPI journal article supplement (doi:10.3390/toxins14110727), 2022-10-25
Supplement: s1 [file toxins-1974591-supplementary.pdf › toxins-1974591-supplementary.pdf]

# Supplementary Material: Analytical Validation of a Direct Competitive ELISA for Multiple Mycotoxin Detection in Human Serum

Kunal Garg, Fausto Villavicencio-Aguilar, Flora Solano-Rivera and Leona Gilbert

**Table S1.** The serum from a healthy donor does not interfere with the recovery and matrix analysis for Aflatoxin B1 (AFB1), deoxynivalenol (DON), fumonisin (FUM), ochratoxin A (OTA), and zearalenone (ZEA). Non-spiked serum pre-treated and extracted with 1% formic acid in acetonitrile provides similar optical density (OD) values to non-spiked 2% BSA. The variation (%CV) between non-spiked serum and 2% BSA is less than 10% and suggests that serum from the healthy donor is negative for AFB1, DON, FUM, OTA, and ZEA.

| Mycotoxin-HRP | Non-spiked serum |          | Non-spiked 2% BSA |          | %CV   |
|---------------|------------------|----------|-------------------|----------|-------|
|               | Repeat 1         | Repeat 2 | Repeat 1          | Repeat 2 |       |
| AFB1-HRP      | 4.000            | 4.000    | 4.000             | 4.000    | 0.000 |
| DON-HRP       | 3.033            | 2.496    | 2.635             | 2.833    | 8.523 |
| FUM-HRP       | 2.298            | 2.129    | 2.239             | 2.382    | 4.700 |
| OTA-HRP       | 4.000            | 3.534    | 3.650             | 3.645    | 5.459 |
| ZEA-HRP       | 3.454            | 2.891    | 3.468             | 3.659    | 9.842 |

**Table S2.** The assay performance from the present study is being compared to commercial tests and emerging methodologies optimized in various matrices for Aflatoxin B1 (AFB1), deoxynivalenol (DON), fumonisin (FUM), ochratoxin A (OTA), and zearalenone (ZEA). The assay performances compared in tables 2 and 3 should not be considered a head-to-head comparison but a comparison between detection techniques that have employed similar formats for establishing detection (i.e., direct detection) and calibration curves (i.e., non-linear).

|                              | AFB1                    | DON                     | FUM                     | OTA                     | ZEA                     |
|------------------------------|-------------------------|-------------------------|-------------------------|-------------------------|-------------------------|
| Present study                | Human serum             |
| Cusabio                      | Edible oil              | Feedstuff and cereals   | Feedstuff and corn      | Wheat, corn, etc        | Wheat, corn, etc        |
| Elabscience                  | Wheat                   | Feedstuff and cereals   | Edible oil              | Cereals                 | Cereals                 |
| Helica™                      | Corn                    | Wheat and corn          | Barley, corn, etc       | Milk, serum, etc        | Barley, rice, etc       |
| AgraQuant®                   | Feedstuff, cereals, etc |
| VICAM                        | Feedstuff               | Cereals                 | Corn                    | Wheat and coffee        | Barley, rice, etc       |
| Wu et al. 2022 [33]          | Corn                    | Corn                    | Corn                    | Corn                    | Corn                    |
| Xing et al. 2020 [34]        | Wheat                   | Wheat                   | Wheat                   | Wheat                   | Wheat                   |
| Charlarmroj et al. 2021 [35] | Buffer                  | Buffer                  | Buffer                  | Buffer                  | Buffer                  |
| Joshi et al. 2016 [36]       | Barley                  | Barley                  | Barley                  | Barley                  | Barley                  |
| Wie et al. 2019 [37]         | Wheat and corn          |

## Reference

- Wu, Y.; Zhou, Y.; Huang, H.; Chen, X.; Leng, Y.; Lai, W.; Huang, X.; Xiong, Y. Engineered Gold Nanoparticles as Multicolor Labels for Simultaneous Multi-Mycotoxin Detection on the Immunochromatographic Test Strip Nanosensor. *Sens. Actuators B Chem.* **2020**, *316*, 128107. <https://doi.org/10.1016/j.snb.2020.128107>.
- Xing, C.; Dong, X.; Xu, T.; Yuan, J.; Yan, W.; Sui, X.; Zhao, X. Analysis of Multiple Mycotoxins-Contaminated Wheat by a Smart Analysis Platform. *Anal. Biochem.* **2020**, *610*, 113928. <https://doi.org/10.1016/j.ab.2020.113928>.
- Charlarmroj, R.; Phuengwas, S.; Makornwattana, M.; Sooksimuang, T.; Sahasithiwat, S.; Panchan, W.; Sukbangnop, W.; Elliott, C.T.; Karoonuthaisiri, N. Development of a Microarray Lateral Flow Strip Test Using a Luminescent Organic Compound for Multiplex Detection of Five Mycotoxins. *Talanta* **2021**, *233*, 122540. <https://doi.org/10.1016/j.talanta.2021.122540>.

36. Joshi, S.; Segarra-Fas, A.; Peters, J.; Zuilhof, H.; Beek, T.A. van Nielen, M.W.F. Multiplex Surface Plasmon Resonance Biosensing and Its Transferability towards Imaging Nanoplasmonics for Detection of Mycotoxins in Barley. *Analyst* **2016**, *141*, 1307–1318. <https://doi.org/10.1039/c5an02512e>.
37. Wei, T.; Ren, P.; Huang, L.; Ouyang, Z.; Wang, Z.; Kong, X.; Li, T.; Yin, Y.; Wu, Y.; He, Q. Simultaneous Detection of Aflatoxin B1, Ochratoxin A, Zearalenone and Deoxynivalenol in Corn and Wheat Using Surface Plasmon Resonance. *Food Chem.* **2019**, *300*, 125176. <https://doi.org/10.1016/j.foodchem.2019.125176>.
